# Supplementary material for: A 3D deep learning approach to epicardial fat segmentation in non-contrast and post-contrast cardiac CT images
Source: PeerJ journal article supplement (doi:10.7717/peerj-cs.806), 2021-12-10
Supplement: Raw_result_data.zip [file Raw_result_data.zip]

## Sheet: U-Net
path	dsc	jsc
NC001_NC.nrrd	0.864917	0.761987
NC002_NC.nrrd	0.887933	0.798454
NC003_NC.nrrd	0.884599	0.793077
NC004_NC.nrrd	0.856551	0.749096
NC005_NC.nrrd	0.776927	0.635226
NC006_NC.nrrd	0.920427	0.852584
NC007_NC.nrrd	0.837726	0.720764
NC008_NC.nrrd	0.874591	0.777132
NC009_NC.nrrd	0.776517	0.634679
NC010_NC.nrrd	0.882146	0.789144
NC011_NC.nrrd	0.658742	0.491145
NC012_NC.nrrd	0.897254	0.813654
NC013_NC.nrrd	0.877379	0.781546
NC014_NC.nrrd	0.859935	0.754287
NC015_NC.nrrd	0.898253	0.8153
NC016_NC.nrrd	0.902662	0.822593
NC017_NC.nrrd	0.8916	0.804403
NC018_NC.nrrd	0.819366	0.694006
NC019_NC.nrrd	0.82465	0.701622
NC020_NC.nrrd	0.88899	0.800164
NC021_NC.nrrd	0.901669	0.820945
NC022_NC.nrrd	0.925994	0.862187
NC023_NC.nrrd	0.898765	0.816143
NC024_NC.nrrd	0.900425	0.818886
NC025_NC.nrrd	0.939291	0.885532
NC026_NC.nrrd	0.879768	0.785345
NC027_NC.nrrd	0.879848	0.785474
NC028_NC.nrrd	0.870039	0.769974
NC029_NC.nrrd	0.91675	0.846295
NC030_NC.nrrd	0.899561	0.817456
NC031_NC.nrrd	0.90901	0.833199
NC032_NC.nrrd	0.896857	0.813001
NC033_NC.nrrd	0.888596	0.799526
NC034_NC.nrrd	0.912868	0.839703
NC035_NC.nrrd	0.906379	0.828787
NC036_NC.nrrd	0.856773	0.749434
NC037_NC.nrrd	0.912859	0.839689
NC038_NC.nrrd	0.922824	0.856707
NC039_NC.nrrd	0.862038	0.757528
NC040_NC.nrrd	0.829453	0.708605
NC041_NC.nrrd	0.918791	0.849781
NC042_NC.nrrd	0.86593	0.76356
NC043_NC.nrrd	0.872382	0.773651
NC044_NC.nrrd	0.920823	0.853265
NC045_NC.nrrd	0.906453	0.828912
NC046_NC.nrrd	0.825422	0.702739
NC047_NC.nrrd	0.910942	0.83645
NC048_NC.nrrd	0.905193	0.826806
NC049_NC.nrrd	0.877768	0.782163
NC050_NC.nrrd	0.865923	0.763549
NC051_NC.nrrd	0.918429	0.849162
NC052_NC.nrrd	0.923753	0.85831
NC053_NC.nrrd	0.931899	0.872482
NC054_NC.nrrd	0.941057	0.888676
NC055_NC.nrrd	0.852226	0.742504
NC056_NC.nrrd	0.934042	0.876247
NC057_NC.nrrd	0.902378	0.82212
NC058_NC.nrrd	0.887118	0.797136
NC059_NC.nrrd	0.921267	0.854027
NC060_NC.nrrd	0.889719	0.801346
NC061_NC.nrrd	0.931856	0.872407
NC062_NC.nrrd	0.915943	0.844922
NC063_NC.nrrd	0.894522	0.809173
NC064_NC.nrrd	0.848938	0.737527
NC065_NC.nrrd	0.906404	0.82883
NC066_NC.nrrd	0.935161	0.878219
NC067_NC.nrrd	0.878065	0.782634
NC068_NC.nrrd	0.922658	0.856421
NC069_NC.nrrd	0.879747	0.785311
NC070_NC.nrrd	0.913202	0.840269
NC071_NC.nrrd	0.889763	0.801417
NC072_NC.nrrd	0.864788	0.761786
NC073_NC.nrrd	0.895592	0.810926
NC074_NC.nrrd	0.898632	0.815924
NC075_NC.nrrd	0.912537	0.839144
NC076_NC.nrrd	0.926151	0.862459
NC077_NC.nrrd	0.842558	0.72795
NC078_NC.nrrd	0.898856	0.816293
NC079_NC.nrrd	0.937987	0.883216
NC080_NC.nrrd	0.923633	0.858102
NC081_NC.nrrd	0.902896	0.822982
NC082_NC.nrrd	0.858894	0.752686
NC083_NC.nrrd	0.915486	0.844145
NC084_NC.nrrd	0.881873	0.788707
NC085_NC.nrrd	0.906464	0.82893
NC086_NC.nrrd	0.924714	0.859971
NC087_NC.nrrd	0.927695	0.865141
NC088_NC.nrrd	0.918202	0.848774
NC089_NC.nrrd	0.920496	0.852704
NC090_NC.nrrd	0.900516	0.819035
NC091_NC.nrrd	0.844624	0.731039
NC092_NC.nrrd	0.877072	0.781058
NC093_NC.nrrd	0.908408	0.832186
NC094_NC.nrrd	0.916302	0.845534
NC095_NC.nrrd	0.902759	0.822753
NC096_NC.nrrd	0.870143	0.770136
NC097_NC.nrrd	0.873682	0.775699
NC098_NC.nrrd	0.855547	0.74756
NC099_NC.nrrd	0.909472	0.833974
NC100_NC.nrrd	0.879252	0.784524
NC101_NC.nrrd	0.893804	0.807998
NC102_NC.nrrd	0.891365	0.804021
NC103_NC.nrrd	0.934238	0.876592
NC104_NC.nrrd	0.923127	0.857229
NC105_NC.nrrd	0.759732	0.612555
NC106_NC.nrrd	0.924023	0.858776
NC107_NC.nrrd	0.868921	0.768223
NC108_NC.nrrd	0.918518	0.849314
NC109_NC.nrrd	0.734674	0.580622
NC110_NC.nrrd	0.888965	0.800123
NC111_NC.nrrd	0.931548	0.871866
NC112_NC.nrrd	0.938257	0.883695
NC113_NC.nrrd	0.904862	0.826254
NC114_NC.nrrd	0.91184	0.837965
NC115_NC.nrrd	0.851233	0.740998
NC116_NC.nrrd	0.92636	0.862822
NC117_NC.nrrd	0.908638	0.832572
NC118_NC.nrrd	0.870755	0.771096
NC119_NC.nrrd	0.929214	0.867787
NC120_NC.nrrd	0.883382	0.791123
NC121_NC.nrrd	0.915133	0.843545
NC122_NC.nrrd	0.875832	0.779093
NC123_NC.nrrd	0.912119	0.838436
NC124_NC.nrrd	0.893135	0.806905
NC125_NC.nrrd	0.830463	0.710078
NC126_NC.nrrd	0.891639	0.804466
NC127_NC.nrrd	0.937045	0.881547
NC128_NC.nrrd	0.922323	0.855844
NC129_NC.nrrd	0.897271	0.813683
NC130_NC.nrrd	0.920069	0.851971
NC131_NC.nrrd	0.922456	0.856072
NC132_NC.nrrd	0.908285	0.831981
NC133_NC.nrrd	0.896971	0.81319
NC134_NC.nrrd	0.889331	0.800717
NC135_NC.nrrd	0.869224	0.768697
NC136_NC.nrrd	0.917037	0.846785
NC137_NC.nrrd	0.924235	0.859142
NC138_NC.nrrd	0.932887	0.874216
NC139_NC.nrrd	0.90293	0.823038
NC140_NC.nrrd	0.871691	0.772564
NC141_NC.nrrd	0.853705	0.744752
NC142_NC.nrrd	0.856767	0.749424
NC143_NC.nrrd	0.9467	0.898794
NC144_NC.nrrd	0.916713	0.846233
NC145_NC.nrrd	0.878661	0.783582
NC146_NC.nrrd	0.912541	0.83915
NC147_NC.nrrd	0.923687	0.858195
NC148_NC.nrrd	0.833861	0.715061
NC149_NC.nrrd	0.902155	0.82175
NC150_NC.nrrd	0.913453	0.840694
NC151_NC.nrrd	0.920683	0.853023
NC152_NC.nrrd	0.925645	0.861583
NC153_NC.nrrd	0.889905	0.801648
NC154_NC.nrrd	0.861325	0.756429
NC155_NC.nrrd	0.932566	0.873652
NC156_NC.nrrd	0.91234	0.83881
NC157_NC.nrrd	0.807017	0.67647
NC158_NC.nrrd	0.874049	0.776277
NC159_NC.nrrd	0.857805	0.751015
NC160_NC.nrrd	0.851622	0.741588
NC161_NC.nrrd	0.932273	0.873138
NC162_NC.nrrd	0.898034	0.814939
NC163_NC.nrrd	0.874948	0.777697
NC164_NC.nrrd	0.902035	0.821552
NC165_NC.nrrd	0.79813	0.664074
NC166_NC.nrrd	0.92901	0.867432
NC167_NC.nrrd	0.865792	0.763346
NC168_NC.nrrd	0.910111	0.835049
NC169_NC.nrrd	0.926635	0.863299
NC170_NC.nrrd	0.905196	0.826811
NC171_NC.nrrd	0.834776	0.716409
NC172_NC.nrrd	0.930596	0.870202
NC173_NC.nrrd	0.922512	0.856169
NC174_NC.nrrd	0.88551	0.794543
NC175_NC.nrrd	0.892517	0.805898
NC176_NC.nrrd	0.921091	0.853725
NC177_NC.nrrd	0.556875	0.385884
NC178_NC.nrrd	0.838423	0.721798
NC179_NC.nrrd	0.780737	0.640338
NC180_NC.nrrd	0.941441	0.889361
NC181_NC.nrrd	0.748475	0.598052
NC182_NC.nrrd	0.924872	0.860245
NC183_NC.nrrd	0.92785	0.865411
NC184_NC.nrrd	0.907032	0.829881
NC185_NC.nrrd	0.847726	0.735699
NC186_NC.nrrd	0.901009	0.819853
NC187_NC.nrrd	0.875659	0.778821
NC188_NC.nrrd	0.879864	0.785498
NC189_NC.nrrd	0.933169	0.874712
NC190_NC.nrrd	0.877518	0.781767
NC191_NC.nrrd	0.88242	0.789582
NC192_NC.nrrd	0.87102	0.771511
NC193_NC.nrrd	0.845573	0.732462
NC194_NC.nrrd	0.904737	0.826045
NC195_NC.nrrd	0.841725	0.726706
NC196_NC.nrrd	0.896017	0.811622
NC197_NC.nrrd	0.88808	0.798691
NC198_NC.nrrd	0.936112	0.879897
NC199_NC.nrrd	0.38094	0.235298
NC200_NC.nrrd	0.862375	0.75805
Fold1 mean	87.4773	78.0632
Fold1 SD	5.00075	7.24789
Fold2 mean	89.9713	81.8896
Fold2 SD	2.8356	4.61147
Fold3 mean	89.2199	80.7729
Fold3 SD	4.14159	6.29871
Fold4 mean	89.5032	81.1503
Fold4 SD	3.20783	5.1536
Fold5 mean	86.447	77.2537
Fold5 SD	0.102208	0.126014
All mean	88.5237	79.8259
All SD	5.8975	7.94303

## Sheet: AG-UNet
path	dsc	jsc
NC001_NC.nrrd	0.886598	0.796298
NC002_NC.nrrd	0.888775	0.799816
NC003_NC.nrrd	0.883102	0.790673
NC004_NC.nrrd	0.850901	0.740496
NC005_NC.nrrd	0.797924	0.663789
NC006_NC.nrrd	0.890085	0.801941
NC007_NC.nrrd	0.800066	0.666759
NC008_NC.nrrd	0.889938	0.801701
NC009_NC.nrrd	0.806739	0.676081
NC010_NC.nrrd	0.872772	0.774265
NC011_NC.nrrd	0.684942	0.520853
NC012_NC.nrrd	0.887312	0.797449
NC013_NC.nrrd	0.890014	0.801824
NC014_NC.nrrd	0.877907	0.782384
NC015_NC.nrrd	0.910627	0.835919
NC016_NC.nrrd	0.925579	0.861468
NC017_NC.nrrd	0.86814	0.767003
NC018_NC.nrrd	0.824439	0.701316
NC019_NC.nrrd	0.83989	0.723975
NC020_NC.nrrd	0.889312	0.800686
NC021_NC.nrrd	0.911034	0.836604
NC022_NC.nrrd	0.928317	0.866224
NC023_NC.nrrd	0.900414	0.818867
NC024_NC.nrrd	0.915507	0.84418
NC025_NC.nrrd	0.944342	0.894553
NC026_NC.nrrd	0.876829	0.780672
NC027_NC.nrrd	0.892759	0.806292
NC028_NC.nrrd	0.871897	0.772888
NC029_NC.nrrd	0.919477	0.850955
NC030_NC.nrrd	0.888869	0.799967
NC031_NC.nrrd	0.918199	0.848768
NC032_NC.nrrd	0.908107	0.831682
NC033_NC.nrrd	0.910035	0.834922
NC034_NC.nrrd	0.908473	0.832295
NC035_NC.nrrd	0.907401	0.830499
NC036_NC.nrrd	0.865867	0.763463
NC037_NC.nrrd	0.895697	0.811097
NC038_NC.nrrd	0.926106	0.862382
NC039_NC.nrrd	0.893658	0.80776
NC040_NC.nrrd	0.82466	0.701638
NC041_NC.nrrd	0.917017	0.846751
NC042_NC.nrrd	0.884085	0.792251
NC043_NC.nrrd	0.86839	0.767394
NC044_NC.nrrd	0.922163	0.855569
NC045_NC.nrrd	0.902848	0.822902
NC046_NC.nrrd	0.817197	0.6909
NC047_NC.nrrd	0.900388	0.818824
NC048_NC.nrrd	0.911601	0.837562
NC049_NC.nrrd	0.861259	0.756326
NC050_NC.nrrd	0.875998	0.779356
NC051_NC.nrrd	0.922162	0.855566
NC052_NC.nrrd	0.930152	0.869425
NC053_NC.nrrd	0.931072	0.871034
NC054_NC.nrrd	0.92497	0.860413
NC055_NC.nrrd	0.812069	0.6836
NC056_NC.nrrd	0.918727	0.849672
NC057_NC.nrrd	0.906129	0.828369
NC058_NC.nrrd	0.90147	0.820615
NC059_NC.nrrd	0.911553	0.837481
NC060_NC.nrrd	0.891223	0.80379
NC061_NC.nrrd	0.919768	0.851454
NC062_NC.nrrd	0.910614	0.835898
NC063_NC.nrrd	0.900223	0.818551
NC064_NC.nrrd	0.860436	0.755058
NC065_NC.nrrd	0.887239	0.797332
NC066_NC.nrrd	0.931346	0.871514
NC067_NC.nrrd	0.894884	0.809766
NC068_NC.nrrd	0.919502	0.850999
NC069_NC.nrrd	0.890518	0.802644
NC070_NC.nrrd	0.913178	0.840229
NC071_NC.nrrd	0.871849	0.772812
NC072_NC.nrrd	0.871764	0.77268
NC073_NC.nrrd	0.882813	0.79021
NC074_NC.nrrd	0.897407	0.813907
NC075_NC.nrrd	0.896905	0.813081
NC076_NC.nrrd	0.921727	0.854818
NC077_NC.nrrd	0.845549	0.732428
NC078_NC.nrrd	0.894289	0.808792
NC079_NC.nrrd	0.929252	0.867854
NC080_NC.nrrd	0.909924	0.834734
NC081_NC.nrrd	0.92221	0.855649
NC082_NC.nrrd	0.895674	0.811059
NC083_NC.nrrd	0.925973	0.86215
NC084_NC.nrrd	0.883398	0.791149
NC085_NC.nrrd	0.911515	0.837417
NC086_NC.nrrd	0.925961	0.86213
NC087_NC.nrrd	0.936403	0.880411
NC088_NC.nrrd	0.917432	0.84746
NC089_NC.nrrd	0.929235	0.867823
NC090_NC.nrrd	0.897851	0.814637
NC091_NC.nrrd	0.855889	0.748083
NC092_NC.nrrd	0.88696	0.796882
NC093_NC.nrrd	0.916677	0.846173
NC094_NC.nrrd	0.918456	0.849209
NC095_NC.nrrd	0.902528	0.82237
NC096_NC.nrrd	0.874886	0.777599
NC097_NC.nrrd	0.891025	0.803467
NC098_NC.nrrd	0.838527	0.721952
NC099_NC.nrrd	0.923308	0.857541
NC100_NC.nrrd	0.881336	0.787848
NC101_NC.nrrd	0.920117	0.852053
NC102_NC.nrrd	0.879113	0.784302
NC103_NC.nrrd	0.943124	0.89237
NC104_NC.nrrd	0.922011	0.855307
NC105_NC.nrrd	0.819813	0.694647
NC106_NC.nrrd	0.92743	0.864681
NC107_NC.nrrd	0.874735	0.77736
NC108_NC.nrrd	0.922786	0.856642
NC109_NC.nrrd	0.737022	0.583561
NC110_NC.nrrd	0.874202	0.776518
NC111_NC.nrrd	0.9233	0.857528
NC112_NC.nrrd	0.94046	0.887611
NC113_NC.nrrd	0.908362	0.83211
NC114_NC.nrrd	0.899316	0.817052
NC115_NC.nrrd	0.844984	0.731578
NC116_NC.nrrd	0.934147	0.876432
NC117_NC.nrrd	0.922597	0.856316
NC118_NC.nrrd	0.86292	0.758892
NC119_NC.nrrd	0.931546	0.871863
NC120_NC.nrrd	0.882319	0.78942
NC121_NC.nrrd	0.929852	0.8689
NC122_NC.nrrd	0.857393	0.750384
NC123_NC.nrrd	0.904697	0.825979
NC124_NC.nrrd	0.903549	0.824067
NC125_NC.nrrd	0.856515	0.749039
NC126_NC.nrrd	0.90684	0.829558
NC127_NC.nrrd	0.934222	0.876564
NC128_NC.nrrd	0.933743	0.875721
NC129_NC.nrrd	0.915765	0.844619
NC130_NC.nrrd	0.927322	0.864493
NC131_NC.nrrd	0.923514	0.857897
NC132_NC.nrrd	0.904008	0.824831
NC133_NC.nrrd	0.939652	0.886174
NC134_NC.nrrd	0.915618	0.844369
NC135_NC.nrrd	0.879068	0.78423
NC136_NC.nrrd	0.926859	0.863688
NC137_NC.nrrd	0.923591	0.858031
NC138_NC.nrrd	0.942759	0.891717
NC139_NC.nrrd	0.894543	0.809207
NC140_NC.nrrd	0.871362	0.772048
NC141_NC.nrrd	0.794415	0.658947
NC142_NC.nrrd	0.891054	0.803514
NC143_NC.nrrd	0.930289	0.869664
NC144_NC.nrrd	0.924809	0.860135
NC145_NC.nrrd	0.880957	0.787241
NC146_NC.nrrd	0.915172	0.84361
NC147_NC.nrrd	0.923607	0.858058
NC148_NC.nrrd	0.891549	0.804319
NC149_NC.nrrd	0.919054	0.850231
NC150_NC.nrrd	0.917747	0.847997
NC151_NC.nrrd	0.928709	0.866907
NC152_NC.nrrd	0.917475	0.847533
NC153_NC.nrrd	0.886402	0.795981
NC154_NC.nrrd	0.891328	0.803961
NC155_NC.nrrd	0.936485	0.880557
NC156_NC.nrrd	0.916196	0.845353
NC157_NC.nrrd	0.798183	0.664147
NC158_NC.nrrd	0.891159	0.803685
NC159_NC.nrrd	0.852929	0.743572
NC160_NC.nrrd	0.83209	0.712461
NC161_NC.nrrd	0.933703	0.875649
NC162_NC.nrrd	0.875563	0.778669
NC163_NC.nrrd	0.863171	0.75928
NC164_NC.nrrd	0.905504	0.827325
NC165_NC.nrrd	0.797704	0.663484
NC166_NC.nrrd	0.924662	0.85988
NC167_NC.nrrd	0.852732	0.743273
NC168_NC.nrrd	0.913368	0.840549
NC169_NC.nrrd	0.900355	0.818769
NC170_NC.nrrd	0.892523	0.805907
NC171_NC.nrrd	0.820854	0.696143
NC172_NC.nrrd	0.906441	0.828891
NC173_NC.nrrd	0.914958	0.843247
NC174_NC.nrrd	0.876399	0.779991
NC175_NC.nrrd	0.886634	0.796355
NC176_NC.nrrd	0.89925	0.816944
NC177_NC.nrrd	0.508217	0.340681
NC178_NC.nrrd	0.827398	0.70561
NC179_NC.nrrd	0.768795	0.624428
NC180_NC.nrrd	0.938459	0.884054
NC181_NC.nrrd	0.590225	0.418668
NC182_NC.nrrd	0.906212	0.828509
NC183_NC.nrrd	0.923794	0.858381
NC184_NC.nrrd	0.899126	0.816739
NC185_NC.nrrd	0.84045	0.724807
NC186_NC.nrrd	0.843457	0.729292
NC187_NC.nrrd	0.879175	0.7844
NC188_NC.nrrd	0.851018	0.740671
NC189_NC.nrrd	0.931628	0.872007
NC190_NC.nrrd	0.864068	0.760669
NC191_NC.nrrd	0.848055	0.736195
NC192_NC.nrrd	0.858134	0.751519
NC193_NC.nrrd	0.84335	0.729133
NC194_NC.nrrd	0.870136	0.770125
NC195_NC.nrrd	0.85495	0.746649
NC196_NC.nrrd	0.876124	0.779556
NC197_NC.nrrd	0.8626	0.758397
NC198_NC.nrrd	0.929511	0.868306
NC199_NC.nrrd	0.387539	0.240359
NC200_NC.nrrd	0.839817	0.723866
Fold1 mean	87.9318	78.751
Fold1 SD	4.67366	6.92876
Fold2 mean	89.6492	81.3564
Fold2 SD	2.83498	4.52713
Fold3 mean	89.7639	81.6431
Fold3 SD	3.90659	6.05997
Fold4 mean	90.0762	82.1235
Fold4 SD	3.52336	5.59568
Fold5 mean	84.7651	74.8184
Fold5 SD	0.109529	0.133481
All mean	88.4372	79.7385
All SD	6.27975	8.38836

## Sheet: DSV-UNet
path	dsc	jsc
NC001_NC.nrrd	0.886598	0.796298
NC002_NC.nrrd	0.888775	0.799816
NC003_NC.nrrd	0.883102	0.790673
NC004_NC.nrrd	0.850901	0.740496
NC005_NC.nrrd	0.797924	0.663789
NC006_NC.nrrd	0.890085	0.801941
NC007_NC.nrrd	0.800066	0.666759
NC008_NC.nrrd	0.889938	0.801701
NC009_NC.nrrd	0.806739	0.676081
NC010_NC.nrrd	0.872772	0.774265
NC011_NC.nrrd	0.684942	0.520853
NC012_NC.nrrd	0.887312	0.797449
NC013_NC.nrrd	0.890014	0.801824
NC014_NC.nrrd	0.877907	0.782384
NC015_NC.nrrd	0.910627	0.835919
NC016_NC.nrrd	0.925579	0.861468
NC017_NC.nrrd	0.86814	0.767003
NC018_NC.nrrd	0.824439	0.701316
NC019_NC.nrrd	0.83989	0.723975
NC020_NC.nrrd	0.889312	0.800686
NC021_NC.nrrd	0.911034	0.836604
NC022_NC.nrrd	0.928317	0.866224
NC023_NC.nrrd	0.900414	0.818867
NC024_NC.nrrd	0.915507	0.84418
NC025_NC.nrrd	0.944342	0.894553
NC026_NC.nrrd	0.876829	0.780672
NC027_NC.nrrd	0.892759	0.806292
NC028_NC.nrrd	0.871897	0.772888
NC029_NC.nrrd	0.919477	0.850955
NC030_NC.nrrd	0.888869	0.799967
NC031_NC.nrrd	0.918199	0.848768
NC032_NC.nrrd	0.908107	0.831682
NC033_NC.nrrd	0.910035	0.834922
NC034_NC.nrrd	0.908473	0.832295
NC035_NC.nrrd	0.907401	0.830499
NC036_NC.nrrd	0.865867	0.763463
NC037_NC.nrrd	0.895697	0.811097
NC038_NC.nrrd	0.926106	0.862382
NC039_NC.nrrd	0.893658	0.80776
NC040_NC.nrrd	0.82466	0.701638
NC041_NC.nrrd	0.904166	0.825094
NC042_NC.nrrd	0.904355	0.825408
NC043_NC.nrrd	0.867596	0.766155
NC044_NC.nrrd	0.925958	0.862124
NC045_NC.nrrd	0.907688	0.830979
NC046_NC.nrrd	0.822493	0.698505
NC047_NC.nrrd	0.904275	0.825276
NC048_NC.nrrd	0.915336	0.843889
NC049_NC.nrrd	0.865097	0.762265
NC050_NC.nrrd	0.876447	0.780068
NC051_NC.nrrd	0.911683	0.837701
NC052_NC.nrrd	0.927604	0.864982
NC053_NC.nrrd	0.936686	0.880912
NC054_NC.nrrd	0.942813	0.891813
NC055_NC.nrrd	0.862381	0.758059
NC056_NC.nrrd	0.937175	0.881777
NC057_NC.nrrd	0.904897	0.826313
NC058_NC.nrrd	0.889995	0.801793
NC059_NC.nrrd	0.92023	0.852247
NC060_NC.nrrd	0.890346	0.802364
NC061_NC.nrrd	0.919389	0.850805
NC062_NC.nrrd	0.908713	0.832698
NC063_NC.nrrd	0.884603	0.793084
NC064_NC.nrrd	0.867061	0.765322
NC065_NC.nrrd	0.902725	0.822697
NC066_NC.nrrd	0.931214	0.871282
NC067_NC.nrrd	0.878956	0.784051
NC068_NC.nrrd	0.910595	0.835865
NC069_NC.nrrd	0.89204	0.805119
NC070_NC.nrrd	0.91011	0.835048
NC071_NC.nrrd	0.873666	0.775673
NC072_NC.nrrd	0.852806	0.743386
NC073_NC.nrrd	0.90368	0.824285
NC074_NC.nrrd	0.908533	0.832396
NC075_NC.nrrd	0.906547	0.829069
NC076_NC.nrrd	0.927958	0.865598
NC077_NC.nrrd	0.83645	0.718879
NC078_NC.nrrd	0.888538	0.799432
NC079_NC.nrrd	0.939132	0.88525
NC080_NC.nrrd	0.912012	0.838256
NC081_NC.nrrd	0.910309	0.835384
NC082_NC.nrrd	0.886592	0.796287
NC083_NC.nrrd	0.917429	0.847454
NC084_NC.nrrd	0.863917	0.760435
NC085_NC.nrrd	0.898219	0.815244
NC086_NC.nrrd	0.923042	0.857082
NC087_NC.nrrd	0.906494	0.828979
NC088_NC.nrrd	0.909414	0.833877
NC089_NC.nrrd	0.903317	0.823681
NC090_NC.nrrd	0.877904	0.78238
NC091_NC.nrrd	0.820096	0.695055
NC092_NC.nrrd	0.865908	0.763526
NC093_NC.nrrd	0.907143	0.830066
NC094_NC.nrrd	0.902686	0.822633
NC095_NC.nrrd	0.889806	0.801487
NC096_NC.nrrd	0.845513	0.732372
NC097_NC.nrrd	0.877277	0.781385
NC098_NC.nrrd	0.837477	0.720397
NC099_NC.nrrd	0.903005	0.823163
NC100_NC.nrrd	0.857987	0.751295
NC101_NC.nrrd	0.907462	0.8306
NC102_NC.nrrd	0.866985	0.765203
NC103_NC.nrrd	0.930192	0.869494
NC104_NC.nrrd	0.914308	0.842143
NC105_NC.nrrd	0.819405	0.694061
NC106_NC.nrrd	0.906952	0.829747
NC107_NC.nrrd	0.881051	0.787392
NC108_NC.nrrd	0.915688	0.844488
NC109_NC.nrrd	0.715178	0.556638
NC110_NC.nrrd	0.846478	0.733821
NC111_NC.nrrd	0.903698	0.824315
NC112_NC.nrrd	0.933183	0.874736
NC113_NC.nrrd	0.890491	0.802599
NC114_NC.nrrd	0.891126	0.803632
NC115_NC.nrrd	0.831962	0.712274
NC116_NC.nrrd	0.917134	0.84695
NC117_NC.nrrd	0.909657	0.834285
NC118_NC.nrrd	0.846197	0.7334
NC119_NC.nrrd	0.91792	0.848292
NC120_NC.nrrd	0.872591	0.773979
NC121_NC.nrrd	0.808291	0.678264
NC122_NC.nrrd	0.821847	0.697573
NC123_NC.nrrd	0.864693	0.761639
NC124_NC.nrrd	0.849673	0.738637
NC125_NC.nrrd	0.690346	0.527122
NC126_NC.nrrd	0.867213	0.765557
NC127_NC.nrrd	0.90071	0.819357
NC128_NC.nrrd	0.890967	0.803373
NC129_NC.nrrd	0.864491	0.761325
NC130_NC.nrrd	0.889346	0.80074
NC131_NC.nrrd	0.896173	0.811878
NC132_NC.nrrd	0.854266	0.745606
NC133_NC.nrrd	0.884662	0.793179
NC134_NC.nrrd	0.898601	0.815873
NC135_NC.nrrd	0.851381	0.741221
NC136_NC.nrrd	0.88171	0.788446
NC137_NC.nrrd	0.907364	0.830436
NC138_NC.nrrd	0.904804	0.826157
NC139_NC.nrrd	0.867392	0.765836
NC140_NC.nrrd	0.850025	0.739169
NC141_NC.nrrd	0.788511	0.650862
NC142_NC.nrrd	0.796755	0.662172
NC143_NC.nrrd	0.923544	0.857949
NC144_NC.nrrd	0.880901	0.787152
NC145_NC.nrrd	0.834557	0.716086
NC146_NC.nrrd	0.874931	0.77767
NC147_NC.nrrd	0.885722	0.794885
NC148_NC.nrrd	0.819295	0.693903
NC149_NC.nrrd	0.872634	0.774047
NC150_NC.nrrd	0.894817	0.809655
NC151_NC.nrrd	0.897776	0.814513
NC152_NC.nrrd	0.881985	0.788886
NC153_NC.nrrd	0.881982	0.78888
NC154_NC.nrrd	0.791019	0.654287
NC155_NC.nrrd	0.900974	0.819794
NC156_NC.nrrd	0.862914	0.758882
NC157_NC.nrrd	0.758666	0.611171
NC158_NC.nrrd	0.845935	0.733005
NC159_NC.nrrd	0.786628	0.648301
NC160_NC.nrrd	0.80111	0.668211
NC161_NC.nrrd	0.908151	0.831756
NC162_NC.nrrd	0.877796	0.782208
NC163_NC.nrrd	0.838863	0.722451
NC164_NC.nrrd	0.892411	0.805724
NC165_NC.nrrd	0.809403	0.679831
NC166_NC.nrrd	0.886871	0.796737
NC167_NC.nrrd	0.835117	0.716912
NC168_NC.nrrd	0.911191	0.83687
NC169_NC.nrrd	0.888914	0.800042
NC170_NC.nrrd	0.860464	0.755101
NC171_NC.nrrd	0.819546	0.694265
NC172_NC.nrrd	0.883458	0.791245
NC173_NC.nrrd	0.903108	0.823333
NC174_NC.nrrd	0.842207	0.727426
NC175_NC.nrrd	0.86784	0.766535
NC176_NC.nrrd	0.875794	0.779034
NC177_NC.nrrd	0.500704	0.333962
NC178_NC.nrrd	0.773706	0.630932
NC179_NC.nrrd	0.702304	0.541196
NC180_NC.nrrd	0.917257	0.84716
NC181_NC.nrrd	0.616812	0.445937
NC182_NC.nrrd	0.883662	0.791573
NC183_NC.nrrd	0.902305	0.822001
NC184_NC.nrrd	0.879574	0.785036
NC185_NC.nrrd	0.825901	0.703435
NC186_NC.nrrd	0.843214	0.728929
NC187_NC.nrrd	0.845518	0.732379
NC188_NC.nrrd	0.81025	0.681026
NC189_NC.nrrd	0.907241	0.83023
NC190_NC.nrrd	0.843785	0.729784
NC191_NC.nrrd	0.860215	0.754718
NC192_NC.nrrd	0.854715	0.746291
NC193_NC.nrrd	0.802223	0.669762
NC194_NC.nrrd	0.874197	0.776511
NC195_NC.nrrd	0.83787	0.720978
NC196_NC.nrrd	0.837071	0.719797
NC197_NC.nrrd	0.868272	0.767209
NC198_NC.nrrd	0.909608	0.834203
NC199_NC.nrrd	0.322687	0.192404
NC200_NC.nrrd	0.815722	0.688793
Fold1 mean	87.9318	78.751
Fold1 SD	4.67366	6.92876
Fold2 mean	89.9299	81.8148
Fold2 SD	2.76078	4.48442
Fold3 mean	88.303	79.2756
Fold3 SD	4.03472	6.09471
Fold4 mean	85.5615	75.0543
Fold4 SD	4.75695	6.93455
Fold5 mean	82.8399	71.9593
Fold5 SD	0.112603	0.131443
All mean	86.9132	77.371
All SD	6.71797	8.78701

## Sheet: AG-DSV-UNet
path	dsc	jsc
NC001_NC.nrrd	0.908032	0.831556
NC002_NC.nrrd	0.913232	0.84032
NC003_NC.nrrd	0.894142	0.808551
NC004_NC.nrrd	0.878056	0.782622
NC005_NC.nrrd	0.792466	0.656269
NC006_NC.nrrd	0.93654	0.880653
NC007_NC.nrrd	0.870589	0.770835
NC008_NC.nrrd	0.894414	0.808997
NC009_NC.nrrd	0.865877	0.763478
NC010_NC.nrrd	0.903963	0.824756
NC011_NC.nrrd	0.727971	0.572298
NC012_NC.nrrd	0.930576	0.870166
NC013_NC.nrrd	0.894366	0.808917
NC014_NC.nrrd	0.864185	0.760851
NC015_NC.nrrd	0.907921	0.83137
NC016_NC.nrrd	0.926952	0.86385
NC017_NC.nrrd	0.903731	0.82437
NC018_NC.nrrd	0.856885	0.749606
NC019_NC.nrrd	0.848441	0.736777
NC020_NC.nrrd	0.907227	0.830207
NC021_NC.nrrd	0.928487	0.86652
NC022_NC.nrrd	0.940535	0.887746
NC023_NC.nrrd	0.909771	0.834478
NC024_NC.nrrd	0.916851	0.846469
NC025_NC.nrrd	0.934063	0.876283
NC026_NC.nrrd	0.8906	0.802777
NC027_NC.nrrd	0.917969	0.848376
NC028_NC.nrrd	0.896267	0.812034
NC029_NC.nrrd	0.931984	0.872632
NC030_NC.nrrd	0.912461	0.839014
NC031_NC.nrrd	0.920821	0.853261
NC032_NC.nrrd	0.896395	0.812242
NC033_NC.nrrd	0.906421	0.828857
NC034_NC.nrrd	0.921355	0.854178
NC035_NC.nrrd	0.927585	0.864951
NC036_NC.nrrd	0.841761	0.72676
NC037_NC.nrrd	0.931893	0.872472
NC038_NC.nrrd	0.932378	0.873323
NC039_NC.nrrd	0.900819	0.819537
NC040_NC.nrrd	0.834424	0.715891
NC041_NC.nrrd	0.924269	0.859202
NC042_NC.nrrd	0.899259	0.816958
NC043_NC.nrrd	0.877333	0.781472
NC044_NC.nrrd	0.919825	0.851552
NC045_NC.nrrd	0.927832	0.86538
NC046_NC.nrrd	0.832949	0.713722
NC047_NC.nrrd	0.91986	0.851613
NC048_NC.nrrd	0.912086	0.838381
NC049_NC.nrrd	0.890035	0.801859
NC050_NC.nrrd	0.888	0.798562
NC051_NC.nrrd	0.916857	0.846479
NC052_NC.nrrd	0.931365	0.871547
NC053_NC.nrrd	0.947843	0.900857
NC054_NC.nrrd	0.935711	0.879189
NC055_NC.nrrd	0.82097	0.69631
NC056_NC.nrrd	0.93363	0.875522
NC057_NC.nrrd	0.911898	0.838063
NC058_NC.nrrd	0.908881	0.83298
NC059_NC.nrrd	0.929684	0.868608
NC060_NC.nrrd	0.891295	0.803906
NC061_NC.nrrd	0.921161	0.853845
NC062_NC.nrrd	0.932876	0.874196
NC063_NC.nrrd	0.911369	0.837171
NC064_NC.nrrd	0.879555	0.785005
NC065_NC.nrrd	0.907855	0.831258
NC066_NC.nrrd	0.933745	0.875724
NC067_NC.nrrd	0.88355	0.791393
NC068_NC.nrrd	0.920322	0.852405
NC069_NC.nrrd	0.888917	0.800046
NC070_NC.nrrd	0.92569	0.86166
NC071_NC.nrrd	0.878549	0.783404
NC072_NC.nrrd	0.867972	0.766742
NC073_NC.nrrd	0.905402	0.827155
NC074_NC.nrrd	0.923776	0.858351
NC075_NC.nrrd	0.906711	0.829343
NC076_NC.nrrd	0.936555	0.88068
NC077_NC.nrrd	0.872416	0.773705
NC078_NC.nrrd	0.910283	0.83534
NC079_NC.nrrd	0.937709	0.882723
NC080_NC.nrrd	0.926586	0.863214
NC081_NC.nrrd	0.912229	0.838623
NC082_NC.nrrd	0.865251	0.762505
NC083_NC.nrrd	0.921773	0.854897
NC084_NC.nrrd	0.879377	0.784722
NC085_NC.nrrd	0.892702	0.806198
NC086_NC.nrrd	0.919422	0.850861
NC087_NC.nrrd	0.924296	0.859247
NC088_NC.nrrd	0.91397	0.841569
NC089_NC.nrrd	0.911753	0.837819
NC090_NC.nrrd	0.893998	0.808316
NC091_NC.nrrd	0.838063	0.721265
NC092_NC.nrrd	0.867819	0.766503
NC093_NC.nrrd	0.910408	0.835549
NC094_NC.nrrd	0.90736	0.83043
NC095_NC.nrrd	0.881691	0.788415
NC096_NC.nrrd	0.863147	0.759243
NC097_NC.nrrd	0.888578	0.799497
NC098_NC.nrrd	0.845678	0.73262
NC099_NC.nrrd	0.908625	0.832551
NC100_NC.nrrd	0.870371	0.770495
NC101_NC.nrrd	0.90481	0.826168
NC102_NC.nrrd	0.895997	0.81159
NC103_NC.nrrd	0.926123	0.862412
NC104_NC.nrrd	0.924144	0.858985
NC105_NC.nrrd	0.768617	0.624191
NC106_NC.nrrd	0.912021	0.838272
NC107_NC.nrrd	0.874519	0.777018
NC108_NC.nrrd	0.916578	0.846003
NC109_NC.nrrd	0.70613	0.545753
NC110_NC.nrrd	0.850853	0.740421
NC111_NC.nrrd	0.927144	0.864184
NC112_NC.nrrd	0.932999	0.874413
NC113_NC.nrrd	0.895143	0.810189
NC114_NC.nrrd	0.904627	0.825862
NC115_NC.nrrd	0.84412	0.730285
NC116_NC.nrrd	0.925816	0.861878
NC117_NC.nrrd	0.919793	0.851497
NC118_NC.nrrd	0.865821	0.763392
NC119_NC.nrrd	0.919435	0.850885
NC120_NC.nrrd	0.871123	0.771673
NC121_NC.nrrd	0.917543	0.847649
NC122_NC.nrrd	0.86364	0.760006
NC123_NC.nrrd	0.89165	0.804485
NC124_NC.nrrd	0.912939	0.839824
NC125_NC.nrrd	0.834395	0.715848
NC126_NC.nrrd	0.895308	0.810459
NC127_NC.nrrd	0.930583	0.870178
NC128_NC.nrrd	0.928669	0.866838
NC129_NC.nrrd	0.910332	0.835422
NC130_NC.nrrd	0.917375	0.847362
NC131_NC.nrrd	0.911372	0.837175
NC132_NC.nrrd	0.911991	0.838221
NC133_NC.nrrd	0.902362	0.822094
NC134_NC.nrrd	0.888222	0.79892
NC135_NC.nrrd	0.852837	0.743432
NC136_NC.nrrd	0.920974	0.853525
NC137_NC.nrrd	0.920764	0.853163
NC138_NC.nrrd	0.940339	0.887395
NC139_NC.nrrd	0.899195	0.816852
NC140_NC.nrrd	0.844316	0.730577
NC141_NC.nrrd	0.852522	0.742953
NC142_NC.nrrd	0.878419	0.783197
NC143_NC.nrrd	0.930939	0.870801
NC144_NC.nrrd	0.923506	0.857883
NC145_NC.nrrd	0.875488	0.77855
NC146_NC.nrrd	0.920507	0.852722
NC147_NC.nrrd	0.931984	0.872631
NC148_NC.nrrd	0.854262	0.7456
NC149_NC.nrrd	0.888446	0.799283
NC150_NC.nrrd	0.915202	0.843662
NC151_NC.nrrd	0.923203	0.857361
NC152_NC.nrrd	0.917635	0.847806
NC153_NC.nrrd	0.899734	0.817742
NC154_NC.nrrd	0.887491	0.797738
NC155_NC.nrrd	0.927573	0.864929
NC156_NC.nrrd	0.912018	0.838266
NC157_NC.nrrd	0.80209	0.669575
NC158_NC.nrrd	0.87532	0.778284
NC159_NC.nrrd	0.859135	0.753056
NC160_NC.nrrd	0.873882	0.776013
NC161_NC.nrrd	0.932351	0.873275
NC162_NC.nrrd	0.879237	0.7845
NC163_NC.nrrd	0.877492	0.781725
NC164_NC.nrrd	0.901109	0.820017
NC165_NC.nrrd	0.847504	0.735365
NC166_NC.nrrd	0.937112	0.881666
NC167_NC.nrrd	0.867028	0.76527
NC168_NC.nrrd	0.92873	0.866944
NC169_NC.nrrd	0.915877	0.844809
NC170_NC.nrrd	0.892904	0.806528
NC171_NC.nrrd	0.848751	0.737245
NC172_NC.nrrd	0.902772	0.822776
NC173_NC.nrrd	0.923684	0.85819
NC174_NC.nrrd	0.889904	0.801646
NC175_NC.nrrd	0.888677	0.799657
NC176_NC.nrrd	0.916328	0.845577
NC177_NC.nrrd	0.649277	0.48069
NC178_NC.nrrd	0.850464	0.739834
NC179_NC.nrrd	0.824183	0.700947
NC180_NC.nrrd	0.947043	0.899414
NC181_NC.nrrd	0.697774	0.535833
NC182_NC.nrrd	0.921599	0.854598
NC183_NC.nrrd	0.92833	0.866247
NC184_NC.nrrd	0.912959	0.839858
NC185_NC.nrrd	0.873254	0.775024
NC186_NC.nrrd	0.805058	0.673723
NC187_NC.nrrd	0.872788	0.77429
NC188_NC.nrrd	0.857845	0.751076
NC189_NC.nrrd	0.929849	0.868895
NC190_NC.nrrd	0.885234	0.7941
NC191_NC.nrrd	0.892629	0.806081
NC192_NC.nrrd	0.876806	0.780637
NC193_NC.nrrd	0.834091	0.715401
NC194_NC.nrrd	0.881728	0.788474
NC195_NC.nrrd	0.854769	0.746372
NC196_NC.nrrd	0.88951	0.801007
NC197_NC.nrrd	0.873546	0.775484
NC198_NC.nrrd	0.929238	0.867829
NC199_NC.nrrd	0.388451	0.241057
NC200_NC.nrrd	0.859066	0.752951
Fold1 mean	89.546	81.3106
Fold1 SD	4.1588	6.37688
Fold2 mean	90.7265	83.1388
Fold2 SD	2.73979	4.46375
Fold3 mean	88.7558	80.041
Fold3 SD	4.36699	6.54185
Fold4 mean	89.6104	81.3187
Fold4 SD	3.12977	5.01707
Fold5 mean	86.4624	77.1375
Fold5 SD	0.0952983	0.118418
All mean	89.0202	80.5893
All SD	5.56119	7.59673
